# Supplementary material for: Global mapping of RNA homodimers in living cells
Source: Genome Res. 2022 May;32(5):956–67. doi: 10.1101/gr.275900.121 (PMC9104694; doi:10.1101/gr.275900.121)
Supplement: Supplemental Material [file supp_gr.275900.121_Supplemental_DatasetS2.xlsx]

## Sheet: Sheet1
Dataset S2. Source data and commands used to call and annotate chimeric reads
dataset	source	sample	hyb command	reference
RNAse E CLASH E.coli	GSE77463	RNaseE_HTF_1	hyb detect format=comp db=Sakai_sRNA_mRNA_F100_2 anti=0 analyse in=RNaseE_1.fasta	Waters, et al. 2016
Ago1 CLASH human	GSE50452	E4_L2HS.txt	hyb analyse in=Ago1_E4_L2HS.txt db=hOH7 format=fastq align=bowtie2 qc=flexbar link=TGGAATTCTCGGGTGCCAAGGC eval=0.001 id=Ago1	Helwak, et al. 2013
SPLASH human	SRR3404931	RNA-seq GM12892 Biotinylated psoralen treated total RNA	hyb analyse in=SRR3404931.1_1.fastq db=hOH7 format=fastq eval=0.001 id=SPLASH_human	Aw, et al. 2016
SPLASH Zika	SRR6252011	ZSIN_REP2	hyb analyse in=ZSIN_REP2.fastq db=hOH7_and_Zika format=fastq link=CTGTAGGCACCATCAAT eval=0.001	Huber, et al. 2019
COMRADES Zika	E-MTAB-6427	1-Livefire1	hyb analyse in=1-Livefire1_comp.fasta db=hOH7_and_Zika format=comp eval=0.001	Ziv, et al. 2018
LIGR-Seq human	SRR3361013	LIGR-Seq_AMT_Ligase_Rep1	hyb analyse fold=vienna in=SRR3361013.fastq db=hMG_plus format=fastq eval=0.001	Sharma, et al. 2016
PARIS human	SRR2814765	HEK293T_3	hyb analyse fold=vienna in=SRR2814765.fastq db=hMG_plus5 format=fastq eval=0.001	Lu, et al. 2016
PARIS Zika	PRJEB28648	MR766_rep1-3	hyb analyse in=MR766_rep3.clean.fastq db=AY632535_2 format=fastq link=CTGTAGGCACCATCAAT eval=0.001	Li, et al. 2018
RIC-Seq human	SRR8632820	RIC-seq_HeLa_rRNA_depleted_rep1	hyb analyse in=SRR8632820.assembled.fastq db=hOH7 format=fastq	Cai, et al. 2020
RPL yeast	SRR2048219	RPL_yeast	hyb analyse in=SRR2048219_RPL_yeast_comp.fasta format=comp db=Yeast_db	Ramani, et al. 2015
COMRADES SARS-CoV-2	GSM4676632	SARS_2S	hyb data downloaded from https://www.ncbi.nlm.nih.gov/geo/query/acc.cgi?acc=GSM4676632	Ziv, et al. 2020
